# Supplementary material
Source: publisher figshare collection journal article supplement (https://sage.figshare.com/ndownloader/files/14144933)
Supplement: Supplementary file 1 [file 14144933]

## Appendix

Appendix Table 1A

*Special Education and Students without Prior Scores are more likely to be Missing  
Reclassification Criteria in Manzanita District (MLOGIT/ODD RATIOS)*

|                               | (1)<br>7 <sup>th</sup> Graders<br>(CELDT/CST) | (2)<br>8 <sup>th</sup> Graders<br>(CELDT/CST/<br>GPA) | (3)<br>8 <sup>th</sup> Graders<br>(CELDT/CST) | (1)<br>7 <sup>th</sup> Graders<br>(CELDT/CST) | (2)<br>8 <sup>th</sup> Graders<br>(CELDT/CST/<br>GPA) | (3)<br>8 <sup>th</sup> Graders<br>(CELDT/CST) |
|-------------------------------|-----------------------------------------------|-------------------------------------------------------|-----------------------------------------------|-----------------------------------------------|-------------------------------------------------------|-----------------------------------------------|
| <b>All Criteria Available</b> |                                               |                                                       |                                               |                                               |                                                       |                                               |
|                               | <b>One Criterion is Missing</b>               |                                                       |                                               | <b>All Criteria are Missing</b>               |                                                       |                                               |
| Female                        | 1.23***<br>(0.07)                             | 0.88<br>(0.09)                                        | 0.86<br>(0.09)                                | 1.29*<br>(0.14)                               | 0.92<br>(0.55)                                        | 1.45<br>(0.54)                                |
| Hispanic (Ref.)               |                                               |                                                       |                                               |                                               |                                                       |                                               |
| Asian                         | 0.83<br>(0.16)                                | 1.22<br>(0.35)                                        | 1.38<br>(0.40)                                | 1.01<br>(0.26)                                | 0.32<br>(0.26)                                        | 0.36<br>(0.32)                                |
| Other                         | 0.84<br>(0.16)                                | 0.52<br>(0.22)                                        | 0.57<br>(0.24)                                | 1.39<br>(0.54)                                | 0.91<br>(0.59)                                        | 0.78<br>(0.56)                                |
| Born in the U.S.              | 0.71***<br>(0.07)                             | 1.05<br>(0.16)                                        | 0.99<br>(0.18)                                | 1.01<br>(0.16)                                | 0.78<br>(0.51)                                        | 0.95<br>(0.27)                                |
| FRL                           | 0.71<br>(0.16)                                | 0.84<br>(0.29)                                        | 0.93<br>(0.29)                                | 0.57<br>(0.17)                                | 0.27***<br>(0.09)                                     | 0.29<br>(0.20)                                |
| Special<br>Education          | 46.41***<br>(13.87)                           | 18.14***<br>(3.12)                                    | 19.04***<br>(3.23)                            | 17.38***<br>(6.22)                            | 4.25**<br>(1.97)                                      | 45.75***<br>(11.59)                           |
| Prior CELDT<br>unavailable†   | 3.58***<br>(0.45)                             | 5.97***<br>(1.48)                                     | 5.87***<br>(1.63)                             | 21.77***<br>(12.33)                           | 26.99***<br>(10.65)                                   | 40.70***<br>(14.44)                           |
| Prior CST<br>unavailable†     | 15.70***<br>(2.62)                            | 4.08***<br>(0.47)                                     | 4.61***<br>(0.50)                             | 118.95***<br>(52.52)                          | 0.19***<br>(0.09)                                     | 1.16<br>(0.47)                                |
|                               |                                               |                                                       | <i>N</i>                                      | 4231                                          | 3430                                                  | 3430                                          |
|                               |                                               |                                                       | <i>df_m</i>                                   | 6.00                                          | 6.00                                                  | 6.00                                          |
|                               |                                               |                                                       | <i>pr2</i>                                    | .47                                           | .41                                                   | .41                                           |

*Note.* All the models include students' cohort and school fixed effects. Model 1 outcome includes three categories for 7<sup>th</sup> graders: 1) all criteria available (reference group) means they have CELDT/CST scores, 2) student has CELDT or CST scores, or 3) the student does not have any scores. Model 2 outcome includes three categories for 8<sup>th</sup> graders: 1) all criteria available (reference group) means they have CELDT, CST and GPA versus 2) they are missing either CELDT, CST, or GPA 3) they are missing both scores and GPA. Model 3 outcome only includes the CELDT and CST for 8<sup>th</sup> graders. † For 7<sup>th</sup> graders prior scores are 6<sup>th</sup> grade CELDT and 5<sup>th</sup> grade CST, and for 8<sup>th</sup> graders prior scores are 7<sup>th</sup> grade CELDT and 6<sup>th</sup> grade CST. Special education students and students who are missing prior years scores (referred unidentifiable students) are more likely to be missing one or all reclassification. Furthermore, in some instances students born in the United States and those that qualify for free and reduce lunch (FRL) are less likely to be missing one or all reclassification criteria.

Appendix Figure 1A

*CELDT and CST ELA (Centered at 556 and 325 and Standardized)*

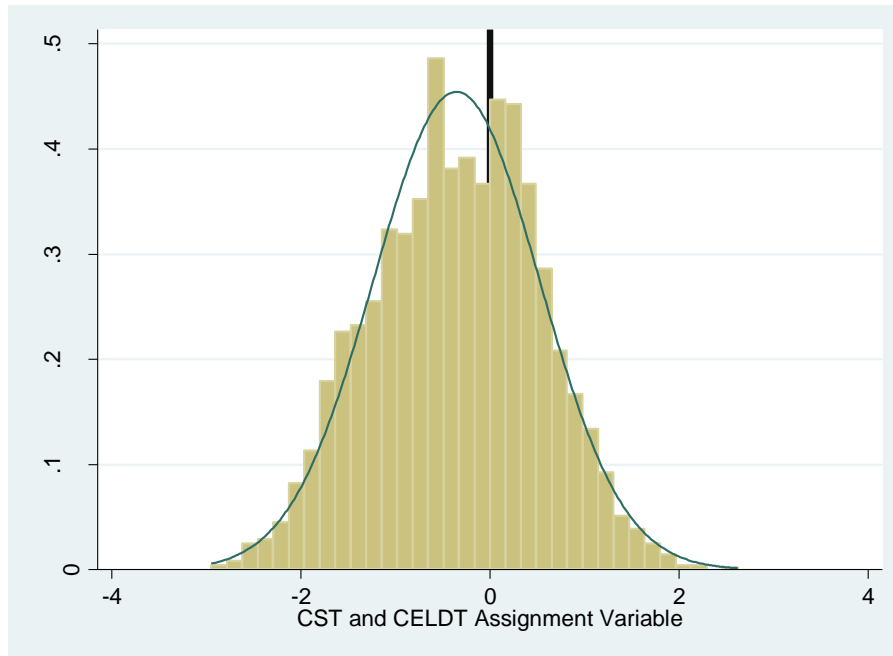

Appendix Figure 2A

*McCrary (2008) Test*

*7<sup>th</sup> Grade*

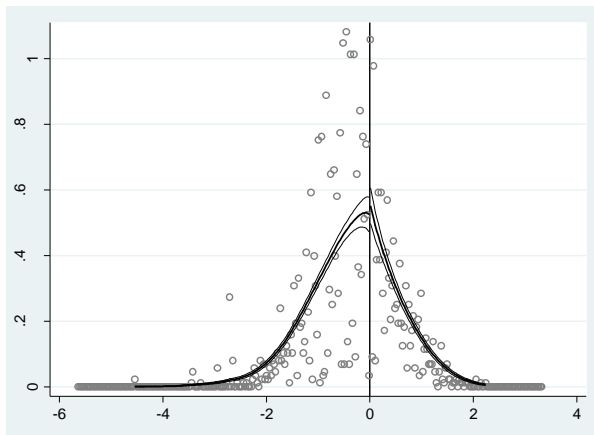

*8<sup>th</sup> Grade*

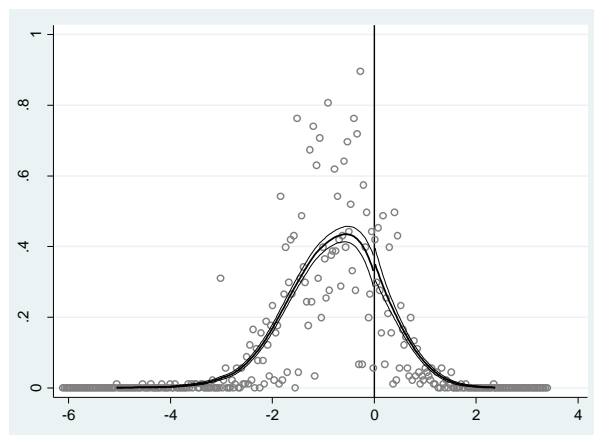

# Appendix Table 2A

## *Students Demographics and Reclassification Assignment Variable*

|                         | Coefficient | Standard Error |
|-------------------------|-------------|----------------|
| Female/Male             | -.04        | .04            |
| Hispanic/Asian American | -.01        | .02            |
| Hispanic/Other          | -.00        | .01            |
| Asian American/Other    | .05         | .13            |
| Born in the US          | -.04        | .04            |
| Free or Reduced Lunch   | -.03        | .02            |
| Special Education       | -.01        | .01            |

Figure 1

### *RD Stage 1 Language Classification (Treatment)*

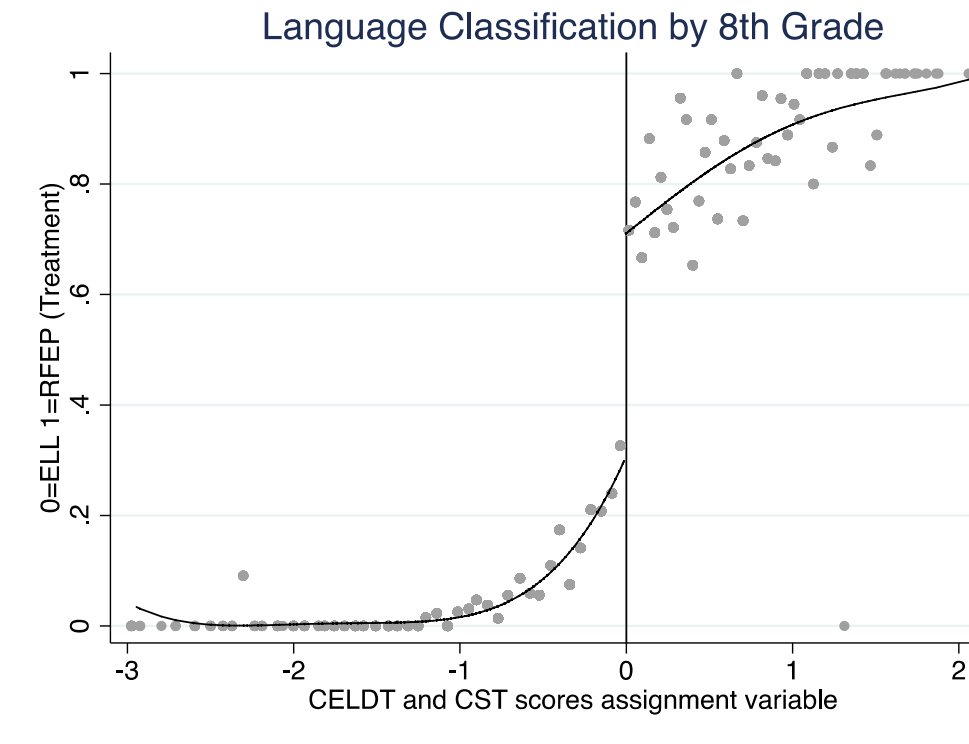

Appendix Table 3A

*Language Classification Effects on Achievement Outcomes*

|         | Math Grade Course |                  |                  |
|---------|-------------------|------------------|------------------|
|         | 9 <sup>th</sup>   | 10 <sup>th</sup> | 11 <sup>th</sup> |
| RD      | .03<br>(.07)      | .12<br>(.08)     | .06<br>(.17)     |
| N       | 2,969             | 2,161            | 1,118            |
| Cohorts | 1-3               | 1-2              | 1                |

*Note.* As a robustness check, we categorized the math courses differently than the original models. Here, 9<sup>th</sup> grade math courses were (1) geometry and (0) honors algebra, algebra, and pre-algebra. In 10<sup>th</sup> grade math courses were (1) algebra II and (0) geometry and algebra I. In 11<sup>th</sup> grade math courses were (1) trigonometry and (0) algebra II, geometry, and algebra I. The RD results remained the same as the original models.

Appendix Table 4A

*Language Classification Effects on Achievement Outcomes (Frontier Models)*

|         | CST ELA         |                  | CAHSEE<br>(Continuous)  |                          | CAHSEE<br>(Pass/Fail)   |                          | Math Grade Course |                  |                  |
|---------|-----------------|------------------|-------------------------|--------------------------|-------------------------|--------------------------|-------------------|------------------|------------------|
|         | 9 <sup>th</sup> | 10 <sup>th</sup> | 10 <sup>th</sup><br>ELA | 10 <sup>th</sup><br>Math | 10 <sup>th</sup><br>ELA | 10 <sup>th</sup><br>Math | 9 <sup>th</sup>   | 10 <sup>th</sup> | 11 <sup>th</sup> |
| RD      | .00<br>(.30)    | -.44<br>(.35)    | -.41<br>(.25)           | .04<br>(.27)             | -.62<br>(.22)           | -.13<br>(.12)            | .12<br>(.11)      | -.07<br>(.18)    | .02<br>(.24)     |
| N       | 1,797           | 912              | 1,797                   | 912                      | 1,797                   | 912                      | 2,425             | 1,797            | 912              |
| Cohorts | 1-2             | 1                | 1-2                     | 1-2                      | 1-2                     | 1-2                      | 1-3               | 1-2              | 1                |

Appendix Table 5A

*Language Classification Effects on Behavior Outcomes (Frontier Models)*

|         | Absences        |                  |                  | On-Campus Suspensions |                  |                  | Off-Campus Suspensions |                  |                  |
|---------|-----------------|------------------|------------------|-----------------------|------------------|------------------|------------------------|------------------|------------------|
|         | 9 <sup>th</sup> | 10 <sup>th</sup> | 11 <sup>th</sup> | 9 <sup>th</sup>       | 10 <sup>th</sup> | 11 <sup>th</sup> | 9 <sup>th</sup>        | 10 <sup>th</sup> | 11 <sup>th</sup> |
| RD      | .01<br>(.15)    | .05<br>(.29)     | -.03<br>(.58)    | -.03<br>(.21)         | .53*<br>(.27)    | .22<br>(.35)     | .08<br>(.17)           | .39<br>(.39)     | .91*<br>(.46)    |
| N       | 2,425           | 1,797            | 912              | 2,425                 | 1,797            | 912              | 2,425                  | 1,797            | 912              |
| Cohorts | 1-3             | 1-2              | 1                | 1-3                   | 1-2              | 1                | 1-3                    | 1-2              | 1                |
